# Supplementary material for: Salivary proteins offer insights into keratinocyte death during aphthous stomatitis. A case-crossover study
Source: Springer Nature journal article supplement (doi:10.1186/s12903-023-02955-7), 2023-05-11
Supplement: MOESM1 [file 25346398]

Supplementary dataset file 1. Salivary pools did not contain quantifiable TNF- $\alpha$  and IFN- $\gamma$  levels (standard curve range was from 19.53 pg/mL to 5,000.00 pg/mL)

| Analyte Name               |          |            |                  |                         |         |        |       |        |             |           |          |       |             |          |           |              |                |
|----------------------------|----------|------------|------------------|-------------------------|---------|--------|-------|--------|-------------|-----------|----------|-------|-------------|----------|-----------|--------------|----------------|
| Bead - Human IFN- $\gamma$ |          |            |                  |                         |         |        |       |        |             |           |          |       |             |          |           |              |                |
| Sample Name                | Position | Clustering | Sample           | Results File            | Event # | MFI    | SD    | CV %   | Nomin al CC | Fitted CC | Final CC | Unit  | Recov ery % | Diluto n | QC Result | Qualit ation | Message        |
| Test002                    | 1 - B2   | Auto       | Healthy controls | Cesar_C2_P1_002.fcs     | 129     | 144.80 | 66.42 | 39.60% |             | 0.00      | 0.00     | pg/mL |             | 1.00     | N/A       | N/A          | Fitting: Below |
| Test003                    | 1 - B3   | Auto       | Healthy controls | Cesar_C3_P1_003.fcs     | 107     | 120.00 | 37.95 | 31.75% |             | 0.00      | 0.00     | pg/mL |             | 1.00     | N/A       | N/A          | Fitting: Below |
| Test004                    | 1 - B4   | Auto       | Ulcerative stage | Cesar_A1_P1_004.fcs     | 113     | 134.40 | 32.02 | 25.82% |             | 0.00      | 0.00     | pg/mL |             | 1.00     | N/A       | N/A          | Fitting: Below |
| Test005                    | 1 - B5   | Auto       | Ulcerative stage | Cesar_A2_P1_005.fcs     | 151     | 113.60 | 39.14 | 30.35% |             | 0.00      | 0.00     | pg/mL |             | 1.00     | N/A       | N/A          | Fitting: Below |
| Test006                    | 1 - B6   | Auto       | Ulcerative stage | Cesar_A3_P1_006.fcs     | 121     | 123.20 | 35.29 | 26.58% |             | 0.00      | 0.00     | pg/mL |             | 1.00     | N/A       | N/A          | Fitting: Below |
| Test007                    | 1 - B7   | Auto       | Remission stage  | Cesar_D1_P1_007.fcs     | 122     | 121.60 | 36.18 | 28.98% |             | 0.00      | 0.00     | pg/mL |             | 1.00     | N/A       | N/A          | Fitting: Below |
| Test008                    | 1 - B8   | Auto       | Remission stage  | Cesar_D2_P1_008.fcs     | 118     | 112.00 | 36.32 | 29.98% |             | 0.00      | 0.00     | pg/mL |             | 1.00     | N/A       | N/A          | Fitting: Below |
| Test009                    | 1 - B9   | Auto       | Remission stage  | Cesar_D3_P1_009.fcs     | 116     | 114.40 | 32.17 | 29.53% |             | 0.00      | 0.00     | pg/mL |             | 1.00     | N/A       | N/A          | Fitting: Below |
| Test010                    | 1 - B10  | Auto       | Ulcer recurrence | Cesar_R1_P1_010.fcs     | 143     | 128.80 | 41.51 | 27.78% |             | 0.00      | 0.00     | pg/mL |             | 1.00     | N/A       | N/A          | Fitting: Below |
| Test011                    | 1 - B11  | Auto       | Ulcer recurrence | Cesar_R2_P1_011.fcs     | 119     | 123.20 | 32.62 | 26.26% |             | 0.00      | 0.00     | pg/mL |             | 1.00     | N/A       | N/A          | Fitting: Below |
| Test012                    | 1 - B12  | Auto       | Ulcer recurrence | Cesar_R3_P1_012.fcs     | 121     | 116.00 | 41.81 | 36.06% |             | 0.00      | 0.00     | pg/mL |             | 1.00     | N/A       | N/A          | Fitting: Below |
| Test021                    | 1 - C9   | Manual     | Healthy controls | Cesar_C1_001_P1_001.fcs | 105     | 100.00 | 34.40 | 29.90% |             | 0.00      | 0.00     | pg/mL |             | 1.00     | N/A       | N/A          | Fitting: Below |
| Bead - Human TNF           |          |            |                  |                         |         |        |       |        |             |           |          |       |             |          |           |              |                |
| Sample Name                | Position | Clustering | Sample           | Results File            | Event # | MFI    | SD    | CV %   | Nomin al CC | Fitted CC | Final CC | Unit  | Recov ery % | Diluto n | QC Result | Qualit ation | Message        |
| Test002                    | 1 - B2   | Auto       | Healthy controls | Cesar_C2_P1_002.fcs     | 131     | 204.80 | 89.55 | 37.09% |             | 1.76      | 1.76     | pg/mL |             | 1.00     | N/A       | N/A          | Fitting: Below |
| Test003                    | 1 - B3   | Auto       | Healthy controls | Cesar_C3_P1_003.fcs     | 137     | 116.80 | 42.11 | 32.66% |             | 0.00      | 0.00     | pg/mL |             | 1.00     | N/A       | N/A          | Fitting: Below |
| Test004                    | 1 - B4   | Auto       | Ulcerative stage | Cesar_A1_P1_004.fcs     | 131     | 105.60 | 46.26 | 37.02% |             | 0.00      | 0.00     | pg/mL |             | 1.00     | N/A       | N/A          | Fitting: Below |
| Test005                    | 1 - B5   | Auto       | Ulcerative stage | Cesar_A2_P1_005.fcs     | 134     | 102.40 | 38.10 | 31.27% |             | 0.00      | 0.00     | pg/mL |             | 1.00     | N/A       | N/A          | Fitting: Below |
| Test006                    | 1 - B6   | Auto       | Ulcerative stage | Cesar_A3_P1_006.fcs     | 125     | 92.00  | 36.18 | 35.01% |             | 0.00      | 0.00     | pg/mL |             | 1.00     | N/A       | N/A          | Fitting: Below |
| Test007                    | 1 - B7   | Auto       | Remission stage  | Cesar_D1_P1_007.fcs     | 140     | 120.80 | 35.58 | 33.68% |             | 0.00      | 0.00     | pg/mL |             | 1.00     | N/A       | N/A          | Fitting: Below |
| Test008                    | 1 - B8   | Auto       | Remission stage  | Cesar_D2_P1_008.fcs     | 143     | 124.00 | 45.07 | 35.52% |             | 0.00      | 0.00     | pg/mL |             | 1.00     | N/A       | N/A          | Fitting: Below |
| Test009                    | 1 - B9   | Auto       | Remission stage  | Cesar_D3_P1_009.fcs     | 136     | 104.80 | 50.85 | 43.05% |             | 0.00      | 0.00     | pg/mL |             | 1.00     | N/A       | N/A          | Fitting: Below |
| Test010                    | 1 - B10  | Auto       | Ulcer recurrence | Cesar_R1_P1_010.fcs     | 130     | 102.40 | 36.62 | 31.85% |             | 0.00      | 0.00     | pg/mL |             | 1.00     | N/A       | N/A          | Fitting: Below |
| Test011                    | 1 - B11  | Auto       | Ulcer recurrence | Cesar_R2_P1_011.fcs     | 124     | 92.00  | 39.44 | 36.76% |             | 0.00      | 0.00     | pg/mL |             | 1.00     | N/A       | N/A          | Fitting: Below |
| Test012                    | 1 - B12  | Auto       | Ulcer recurrence | Cesar_R3_P1_012.fcs     | 133     | 112.80 | 53.97 | 42.52% |             | 0.00      | 0.00     | pg/mL |             | 1.00     | N/A       | N/A          | Fitting: Below |
| Test021                    | 1 - C9   | Manual     | Healthy controls | Cesar_C1_001_P1_001.fcs | 85      | 87.20  | 32.02 | 33.45% |             | 0.00      | 0.00     | pg/mL |             | 1.00     | N/A       | N/A          | Fitting: Below |
