# Supplementary material for: Salivary proteins offer insights into keratinocyte death during aphthous stomatitis. A case-crossover study
Source: Springer Nature journal article supplement (doi:10.1186/s12903-023-02955-7), 2023-05-11
Supplement: MOESM2 [file 25346398]

**Supplementary dataset file 2.** Quantification of each dot blot shown in the 3C figure. Values in bold were removed from the comparison analysis by ANOVA.

HEALTHY CONTROLS

|   | 1         | 2         | 3                 | 4                 |
|---|-----------|-----------|-------------------|-------------------|
| A | 5.363,497 | 511,577   | 451,527           | 2.194,912         |
| B | 3.506,205 | 174,042   | 4.771,255         | 155,021           |
| C | 6.696,690 | 9.592,134 | <b>11.849,912</b> | 949,891           |
| D | 6.851,518 | 1.974,598 | 1.119,355         | <b>18.682,933</b> |
| E | 6.600,468 | 3.850,891 | 1.920,962         | 803,527           |
| F | 3.974,640 | 238,406   | 8.903,497         | 547,698           |
| G | 2.225,397 | 417,255   | 2.029,912         | 1.317,305         |
| H | 710,255   | 4.061,548 | 1.498,598         |                   |

REMISSION STAGE

|   | 1         | 2                 | 3                 | 4                | 5                |
|---|-----------|-------------------|-------------------|------------------|------------------|
| A | 1.619,477 | <b>9.946,134</b>  | 3.111,962         | 695,184          | 788,447          |
| B | 2.378,891 | 3.902,154         | 1.087,527         | 446,991          | 784,326          |
| C | 421,113   | 724,648           | 2.207,376         | 6.441,083        | <b>9.876,874</b> |
| D | 247,213   | 4.009,276         | 1.843,134         | 6.974,480        | 3.025,175        |
| E | 490,355   | 240,950           | 446,627           | 581,163          |                  |
| F | 734,062   | 1.359,598         | 6.297,962         | 870,527          |                  |
| G | 5.938,104 | 6.693,912         | <b>12.009,225</b> | <b>8.089,276</b> |                  |
| H | 577,790   | <b>11.385,912</b> | 5.704,426         | 6.832,933        |                  |

ULCERATIVE STAGE

|   | 1                | 2              | 3                 | 4         | 5                 |
|---|------------------|----------------|-------------------|-----------|-------------------|
| A | 834,941          | 5.697,397      | 1.167,548         | 8.921,154 | <b>13.063,246</b> |
| B | 1.426,598        | 2.033,205      | 7.305,205         | 7.020,326 | <b>20.464,045</b> |
| C | <b>474,548</b>   | 3.421,205      | <b>10.756,083</b> | 6.901,790 | 2.436,589         |
| D | <b>9.649,447</b> | 4.375,033      | 5.613,205         | 1.109,012 | 2.634,853         |
| E | 2.036,062        | 5.552,983      | 3.879,326         | 7.723,619 | 11.069,610        |
| F | 2.155,255        | 9.776,640      | 4.346,326         | 2.865,033 |                   |
| G | <b>376,406</b>   | 503,991        | 1.365,184         | 2.397,891 |                   |
| H | 1.481,820        | <b>365,870</b> | 4.826,497         | 7.694,841 |                   |

RECURRENCE STAGE

|   | 1                 | 2                 |
|---|-------------------|-------------------|
| A | 5.405,376         | 2.865,518         |
| B | 10.937,790        | <b>11.740,054</b> |
| C | 2.167,820         | <b>270,304</b>    |
| D | <b>10.704,669</b> | 4.716,104         |
| E | 4.749,719         | 2.963,983         |
| F | 3.538,891         | 4.938,882         |

|   |           |           |
|---|-----------|-----------|
| G | 4.760,255 | 2.001,882 |
| H | 8.636,790 |           |

NEGATIVE (NC) AND POSITIVE (PC) CONTROLS

|             |    |
|-------------|----|
| 25,536      | NC |
| 33,243      | NC |
| 229.534,560 | PC |

We used the Image J software to quantify the dot blot assays and the descriptive statistics were performed (GraphPad Prism 8.0.1 software, GraphPad Software, Inc. San Diego, USA), we performed a one-way ANOVA, extreme values were removed from the analysis for graphing (shown in bold in the table) and the Benjamini Krieger an Yekutieli test assessed the statistical significance of differences between mean values.

| Ordinary one-way ANOVA |                                                                               |                   |                           |           |           |          |
|------------------------|-------------------------------------------------------------------------------|-------------------|---------------------------|-----------|-----------|----------|
| Multiple comparisons   |                                                                               |                   |                           |           |           |          |
| 1                      | Number of families                                                            |                   |                           |           |           |          |
| 2                      | Number of comparisons per family                                              |                   |                           |           |           |          |
| 3                      | Q                                                                             |                   |                           |           |           |          |
| 4                      |                                                                               |                   |                           |           |           |          |
| 5                      | <b>Two-stage linear step-up procedure of Benjamini, Krieger and Yekutieli</b> | <b>q value</b>    | <b>Individual P Value</b> |           |           |          |
| 6                      | CONTROL vs. ULCERA                                                            | 0.0124            | 0.0237                    | A-B       |           |          |
| 7                      | CONTROL vs. REMISSION                                                         | 0.3274            | 0.9356                    | A-C       |           |          |
| 8                      | CONTROL vs. RECURRENCIA                                                       | 0.0111            | 0.0155                    | A-D       |           |          |
| 9                      | ULCERA vs. REMISSION                                                          | 0.0111            | 0.0158                    | B-C       |           |          |
| 10                     | ULCERA vs. RECURRENCIA                                                        | 0.2108            | 0.5020                    | B-D       |           |          |
| 11                     | REMISSION vs. RECURRENCIA                                                     | 0.0111            | 0.0114                    | C-D       |           |          |
| 12                     |                                                                               |                   |                           |           |           |          |
| 13                     | <b>Test details</b>                                                           | <b>Mean Diff.</b> | <b>SE of diff.</b>        | <b>n1</b> | <b>n2</b> | <b>t</b> |
| 14                     | CONTROL vs. ULCERA                                                            | -1455             | 634.4                     | 31        | 35        | 2.293    |
| 15                     | CONTROL vs. REMISSION                                                         | 51.41             | 634.4                     | 31        | 35        | 0.08103  |
| 16                     | CONTROL vs. RECURRENCIA                                                       | -1990             | 809.1                     | 31        | 15        | 2.459    |
| 17                     | ULCERA vs. REMISSION                                                          | 1506              | 614.9                     | 35        | 35        | 2.450    |
| 18                     | ULCERA vs. RECURRENCIA                                                        | -534.7            | 793.9                     | 35        | 15        | 0.6736   |
| 19                     | REMISSION vs. RECURRENCIA                                                     | -2041             | 793.9                     | 35        | 15        | 2.571    |
| 20                     |                                                                               |                   |                           |           |           |          |
