# Supplementary material for: Salivary proteins offer insights into keratinocyte death during aphthous stomatitis. A case-crossover study
Source: Springer Nature journal article supplement (doi:10.1186/s12903-023-02955-7), 2023-05-11

# Supplementary figure. Uncropped scans of gels and blots

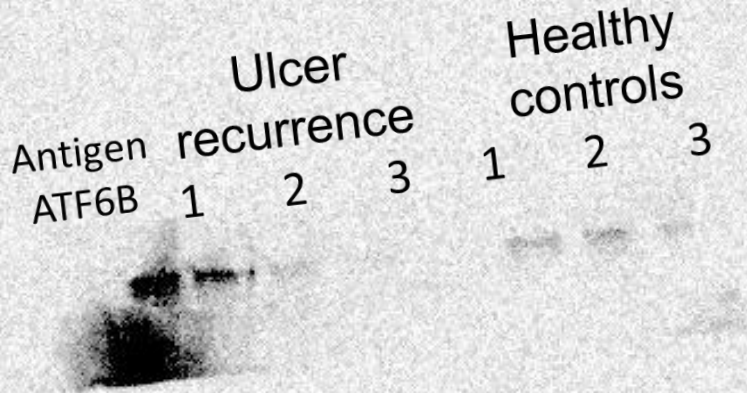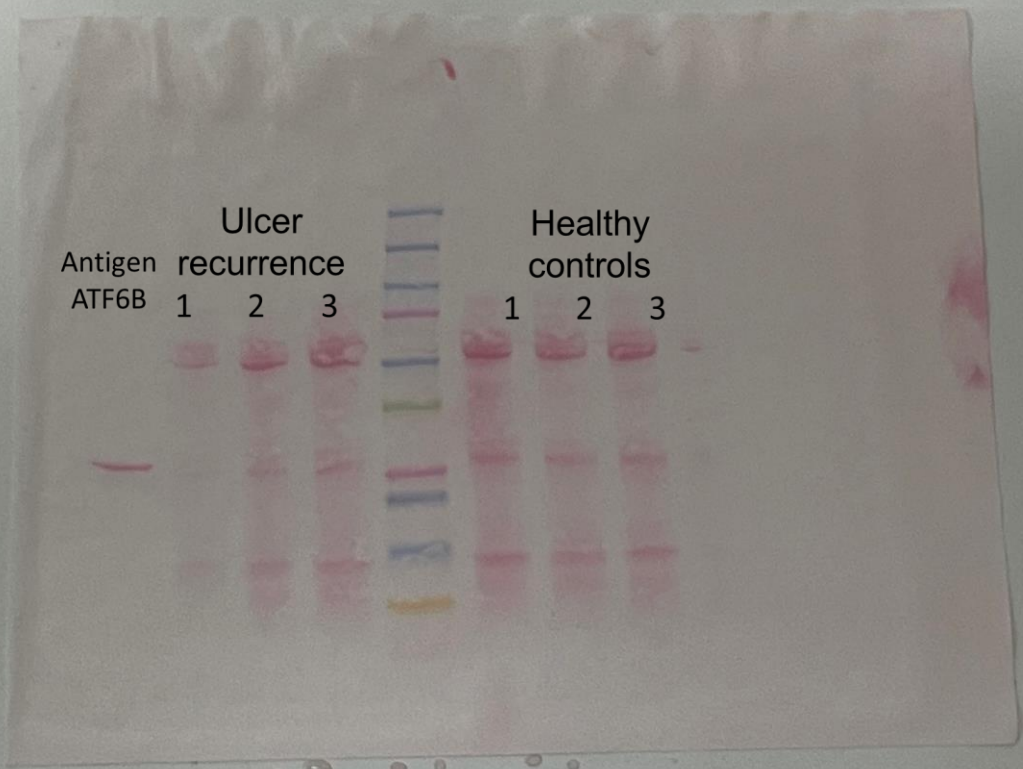



# Supplementary figure. Uncropped scans of gels and blots

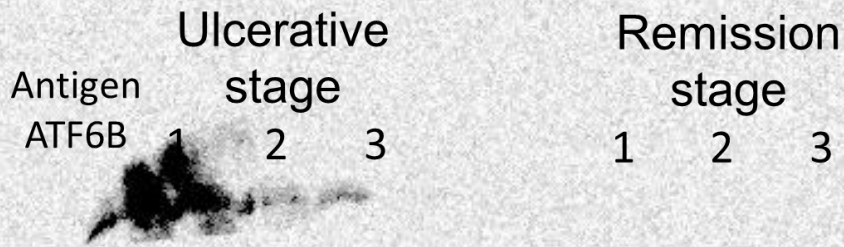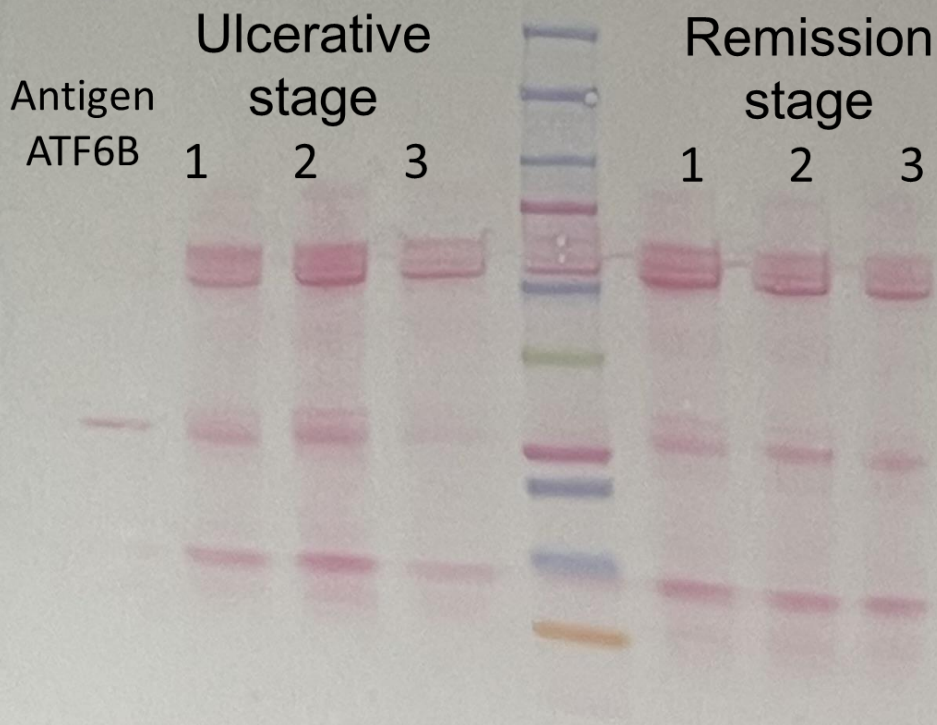

Supplement: MOESM3 [file 25346398]
